# Supplementary material for: The current status of hydrogen storage in metal–organic frameworks—updated
Source: Royal Society of Chemistry journal article supplement (doi:10.1039/c1ee01240a), 2011-01-01
Supplement: c1ee01240a.pdf [file c1ee01240a.pdf]

Supporting information

## **The Current Status of Hydrogen Storage in Metal-Organic Frameworks-Updated**

**Julian Sculley, Daqiang Yuan\* and Hong-Cai Zhou\***

Abbreviation, full name and chemical structure of the ligands listed in Table 2

### **1,2-pda**

1,2-propanediamine

### **1,2-dach**

1,2-diaminocyclohexane

### **1,3-bdp**

1,3-benzenedi(4-pyrazol-1-ide)

### **1,4-bdp**

1,4-benzenedi(4-pyrazol-1-ide)

### **2,6-ndc**

2,6-naphthalenedicarboxylate

**2,7-ndc**

2,7-naphthalenedicarboxylate

**3,4'-bpdc**

3,4'-biphenyldicarboxylate

**4,4'-bipy**

4,4'-bipyridine

**5-at**

5-aminotetrazol-1-ide

**abdc**

2-aminobenzene-1,4-dicarboxylate

**abtc**

azobenzene-3,3',5,5'-tetracarboxylate

**adc**

9,10-anthracenedicarboxylate

**adip**

5,5'-(9,10-anthracenediyl)di-isophthalate

**babdc**

2-benzamidoterephthalate

**bbc**

4,4',4''-(Benzene-1,3,5-triyl-tris(benzene-4,1-diyl))tribenzoate

**bbnip**

5,5',5'',5'''-(2,2'-bis(benzoyloxy)-[1,1'-binaphthalene]-4,4',6,6'-tetrayl)tetraisophthalate

**bbta**

benzo[1,2-d:4,5-d']bis([1,2,3]triazole)-1,5-diide

**bbtei**

5,5',5''-(benzene-1,3,5-triyltris(benzene-4,1-diyl))triisophthalate

**bceb**

5,5'-(1,3-phenylenebis(ethyne-2,1-diyl))diisophthalate

**bdc**

1,4-benzenedicarboxylate

**bpdc**

4,4'-biphenyldicarboxylate

**bpe**

1,2-bis(4-pyridyl)ethane

**bpee**

1,2-di(pyridin-4-yl)ethane

**bpndc**

benzophenone 4,4'-dicarboxylate

**bpt**

biphenyl-3,4',5-tricarboxylate

**bptc**

3,3',5,5'-biphenyltetracarboxylate

**bpybc**

4,4'-([4,4'-bipyridine]-1,1'-diium-1,1'-diylbis(methylene))dibenzoate

**btb**

benzene-1,3,5-tribenzoate

**btbz**

4,4',4'',4'''-benzene-1,2,4,5-tetrayltetraobenzoate

**btc**

1,3,5-benzenetricarboxylate

**btdd**

bis(1,2,3-triazolo-[4,5-b],[4',5'-i])dibenzo[1,4]dioxin

**bte**

4,4',4''-(Benzene-1,3,5-triyltris(ethyne-2,1-diyl))tribenzoate

**btei**

5,5',5''-(benzene-1,3,5-triyltris(ethyne-2,1-diyl))triisophthalate

**btt**

1,3,5-benzenetristetrazolate

**cbat**

4-(4-carboxylatobenzamido)benzoate

**cnc**

4-carboxycinnamic

**cpip**

5-(5-carboxylatopyridin-2-yl)isophthalate

**cpmip**

5-(5-carboxylatopyrimidin-2-yl)isophthalate

**cptt**

5'-(4-carboxylatophenyl)-[1,1':3',1''-terphenyl]-3,4'',5-tricarboxylate

**cyclam**

1,4,8,11-tetraazacyclotetradecane

**dabco**

1,4-diazabicyclo[2.2.2]octane

**dbi**

5,5'-(buta-1,3-diyne-1,4-diyl)diisophthalate

**dbtb**

2,2'-diethoxy-1,1'-binaphthyl-4,4',6,6'-tetrabenzoate

**denip**

5,5',5'',5'''-(2,2'-diethoxy-[1,1'-binaphthalene]-4,4',6,6'-tetrayl)tetrakisophthalate

**dhdip**

5,5'-(9,10-dihydrophenanthrene-2,7-diyl)diisophthalate

**dhnip**

5,5',5'',5'''-(2,2'-dihydroxy-[1,1'-binaphthalene]-4,4',6,6'-tetrayl)tetraisophthalate

**diyb**

4,4'-(1,4-phenylene)bis(imidazol-1-ide)

**dmsdip**

5,5'-(dimethylsilanediyl)diisophthalate

**dpt**

3,6-di-4-pyridyl-1,2,4,5-tetrazine

**dpt24**

3-(2-pyridyl)-5-(4-pyridyl)-1,2,4-triazolate

**ebdc**

5,5'-(1,2-ethynediyl)bis(1,3-benzenedicarboxylate)

**e-urea**

2-imidazolidinone

**fma**

fumarate

**ftpc**

2',5'-difluoro-[1,1':4',1''-terphenyl]-3,3'',5,5''-tetracarboxylate

**habdc**

2-hexanamidoterephthalate

**Himdc**

1*H*-imidazole-4,5-dicarboxylate

**int**

isonicotinate

**ip**

isophthalate

**mdip**

5,5'-methylene-di-isophthalate

**mdpt24**

3-(3-methyl-2-pyridyl)-5-(4-pyridyl)-1,2,4-triazolate

**miai**

2-methylimidazolate-4-amide-5-imidate

**mip**

5-methylisophthalate

**mtb**

methanetetra benzoate

**mtbdt**

3,3',3'',3'''-(methanetetrayltetrakis(benzene-4,1-diyl))tetraacrylate

**mtbet**

4,4',4'',4'''-((methanetetrayltetrakis(benzene-4,1-diyl))tetrakis(ethyne-2,1-diyl))tetrabenzoate

**mtptc**

2',5'-dimethyl-[1,1':4',1''-terphenyl]-3,3'',5,5''-tetracarboxylate

**mttc**

4'',4''''',4''''''',4'''''''''-methanetetrayltetrakis((1,1':4',1''-terphenyl)-4-carboxylate))

**ndip**

5,5'-(naphthalene-2,6-diyl)diisophthalate

**nתי**

5,5',5''-((nitrilotris(benzene-4,1-diyl))tris(ethyne-2,1-diyl))triisophthalate

**oda**

2,2'-oxydiacetate

**ox**

oxalate

**pba**

4-(pyridin-4-yl)benzoate

**phdip**

5,5'-(phenanthrene-2,7-diyl)diisophthalate

**pmtb**

diphenylmethane-3,3',5,5'-tetrakis(3,5-bisbenzoate)

**ptei**

5,5'-((5'-(4-((3,5-dicarboxylatophenyl)ethynyl)phenyl)-[1,1':3',1''-terphenyl]-4,4''-diyl)  
bis(ethyne-2,1-diyl))diisophthalate

**pubdc**

2-(3-phenylureido)terephthalate

**qptc**

quaterphenyl-3,3'',5,5''-tetracarboxylate

**tatb**

4,4',4''-s-triazine-2,4,6-triyltribenzoate

**tcpbda**

*N,N,N',N'*-tetrakis(4-carboxyphenyl)-biphenyl-4,4'-diamine

**tcpom**

tetrakis[4-(carboxyphenyl)oxamethyl]methane

**tfbdc**

tetrafluoroterephthalate

**tftptc**

2',3',5',6'-tetrafluoro-[1,1':4',1''-terphenyl]-3,3'',5,5''-tetracarboxylate

**tmtptc**

2',3',5',6'-tetramethyl-[1,1':4',1''-terphenyl]-3,3'',5,5''-tetracarboxylate

**tpdc**

[1,1':4',1''-terphenyl]-3,3''-dicarboxylate

**tpom**

tetrakis-(4-pyridyloxymethyl)methane

**tptc**

terphenyl-3,3",5,5"-tetracarboxylate

**trza**

1,2,4-triazolate

**ttca**

triphenylene-2,6,10-tricarboxylate

**ttei**

5,5',5''-(((benzene-1,3,5-triyltris(ethyne-2,1-diyl))tris(benzene-4,1-diyl))tris(ethyne-2,1-diyl))triisophthalate

**tz**

tetrazolate

**tzc**

tetrazolate-5-carboxylate

**tzdc**

4,5-dicarboxylato-1,2,3-triazol-1-ide

**tzip**

5-(1H-tetrazol-1-yl)isophthalate
